# Supplementary material
Source: MDPI journal article supplement (https://www.mdpi.com/2073-4352/5/3/283)

# checkCIF/PLATON report

Structure factors have been supplied for datablock(s) 1, 2

THIS REPORT IS FOR GUIDANCE ONLY. IF USED AS PART OF A REVIEW PROCEDURE FOR PUBLICATION, IT SHOULD NOT REPLACE THE EXPERTISE OF AN EXPERIENCED CRYSTALLOGRAPHIC REFEREE.

No syntax errors found.      CIF dictionary      Interpreting this report

## Datablock: 1

---

|                 |                        |                               |
|-----------------|------------------------|-------------------------------|
| Bond precision: | C-C = 0.0052 Å         | Wavelength=0.71073            |
| Cell:           | a=8.0275(10)           | b=7.8676(13)      c=34.961(5) |
|                 | alpha=90               | beta=90.106(9)      gamma=90  |
| Temperature:    | 296 K                  |                               |
|                 | Calculated             | Reported                      |
| Volume          | 2208.0(6)              | 2208.0(5)                     |
| Space group     | P 21/n                 | P 21/n                        |
| Hall group      | -P 2yn                 | -P 2yn                        |
| Moiety formula  | C14 H5 N3 O9, C6 H4 S4 | C14 H5 N3 O9, C6 H4 S4        |
| Sum formula     | C20 H9 N3 O9 S4        | C20 H9 N3 O9 S4               |
| Mr              | 563.54                 | 563.54                        |
| Dx,g cm-3       | 1.695                  | 1.695                         |
| Z               | 4                      | 4                             |
| Mu (mm-1)       | 0.492                  | 0.492                         |
| F000            | 1144.0                 | 1144.0                        |
| F000'           | 1146.56                |                               |
| h,k,lmax        | 9,9,41                 | 9,9,41                        |
| Nref            | 3908                   | 3897                          |
| Tmin,Tmax       | 0.790,0.961            | 0.475,0.514                   |
| Tmin'           | 0.744                  |                               |

Correction method= # Reported T Limits: Tmin=0.475 Tmax=0.514  
AbsCorr = PSI-SCAN

Data completeness= 0.997      Theta(max)= 25.005

R(reflections)= 0.0490( 2464)      wR2(reflections)= 0.1458( 3897)

S = 1.037      Npar= 326

---

The following ALERTS were generated. Each ALERT has the format

**test-name\_ALERT\_alert-type\_alert-level.**

Click on the hyperlinks for more details of the test.

---

### Alert level B

|                   |                                                |       |        |
|-------------------|------------------------------------------------|-------|--------|
| PLAT019_ALERT_1_B | _diffn_measured_fraction_theta_full/_max < 1.0 | 0.975 | Report |
| PLAT430_ALERT_2_B | Short Inter D...A Contact O16 .. O18 ..        | 2.84  | Ang.   |

---

### Alert level C

|                   |                                                 |        |        |
|-------------------|-------------------------------------------------|--------|--------|
| PLAT230_ALERT_2_C | Hirshfeld Test Diff for O18 -- N17 ..           | 5.7    | su     |
| PLAT340_ALERT_3_C | Low Bond Precision on C-C Bonds .....           | 0.0052 | Ang.   |
| PLAT430_ALERT_2_C | Short Inter D...A Contact O15 .. O21 ..         | 2.88   | Ang.   |
| PLAT480_ALERT_4_C | Long H...A H-Bond Reported H8A .. S32 ..        | 3.02   | Ang.   |
| PLAT906_ALERT_3_C | Large K value in the Analysis of Variance ..... | 2.806  | Check  |
| PLAT911_ALERT_3_C | Missing # FCF Refl Between THmin & STh/L= 0.595 | 11     | Report |

---

### Alert level G

|                   |                                                  |    |        |
|-------------------|--------------------------------------------------|----|--------|
| PLAT007_ALERT_5_G | Number of Unrefined Donor-H Atoms .....          | 1  | Report |
| PLAT909_ALERT_3_G | Percentage of Observed Data at Theta(Max) still  | 31 | %      |
| PLAT910_ALERT_3_G | Missing # of FCF Reflection(s) Below Th(Min) ... | 1  | Report |

---

0 **ALERT level A** = Most likely a serious problem - resolve or explain  
2 **ALERT level B** = A potentially serious problem, consider carefully  
6 **ALERT level C** = Check. Ensure it is not caused by an omission or oversight  
3 **ALERT level G** = General information/check it is not something unexpected

1 ALERT type 1 CIF construction/syntax error, inconsistent or missing data  
3 ALERT type 2 Indicator that the structure model may be wrong or deficient  
5 ALERT type 3 Indicator that the structure quality may be low  
1 ALERT type 4 Improvement, methodology, query or suggestion  
1 ALERT type 5 Informative message, check

---

## Datablock: 2

---

|                 |                |                    |             |
|-----------------|----------------|--------------------|-------------|
| Bond precision: | C-C = 0.0052 A | Wavelength=0.71073 |             |
| Cell:           | a=19.078(5)    | b=7.2068(14)       | c=19.443(4) |
|                 | alpha=90       | beta=117.833(12)   | gamma=90    |
| Temperature:    | 296 K          |                    |             |

|                | Calculated             | Reported               |
|----------------|------------------------|------------------------|
| Volume         | 2364.0(9)              | 2364.0(9)              |
| Space group    | P 21/n                 | P 21/n                 |
| Hall group     | -P 2yn                 | -P 2yn                 |
| Moiety formula | C15 H7 N3 O9, C6 H4 S4 | C15 H7 N3 O9, C6 H4 S4 |
| Sum formula    | C21 H11 N3 O9 S4       | C21 H11 N3 O9 S4       |
| Mr             | 577.57                 | 577.57                 |
| Dx,g cm-3      | 1.623                  | 1.623                  |
| Z              | 4                      | 4                      |
| Mu (mm-1)      | 0.462                  | 0.462                  |
| F000           | 1176.0                 | 1176.0                 |
| F000'          | 1178.57                |                        |
| h,k,lmax       | 22,8,23                | 22,8,23                |
| Nref           | 4181                   | 4165                   |
| Tmin,Tmax      | 0.837,0.982            | 0.656,0.703            |
| Tmin'          | 0.758                  |                        |

Correction method= # Reported T Limits: Tmin=0.656 Tmax=0.703  
AbsCorr = PSI-SCAN

Data completeness= 0.996                      Theta(max)= 25.022

R(reflections)= 0.0482( 2393)              wR2(reflections)= 0.1161( 4165)

S = 1.002                                      Npar= 336

The following ALERTS were generated. Each ALERT has the format

**test-name\_ALERT\_alert-type\_alert-level.**

Click on the hyperlinks for more details of the test.

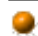

#### Alert level B

PLAT019\_ALERT\_1\_B \_diffn\_measured\_fraction\_theta\_full/\_max < 1.0              0.977 Report

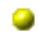

#### Alert level C

|                                                                   |                                        |             |
|-------------------------------------------------------------------|----------------------------------------|-------------|
| PLAT241_ALERT_2_C High                                            | Ueq as Compared to Neighbors for ..... | S30 Check   |
| PLAT242_ALERT_2_C Low                                             | Ueq as Compared to Neighbors for ..... | N21 Check   |
| PLAT340_ALERT_3_C Low Bond Precision on C-C Bonds .....           |                                        | 0.0052 Ang. |
| PLAT480_ALERT_4_C Long H...A H-Bond Reported H14A .. O19 ..       |                                        | 2.65 Ang.   |
| PLAT906_ALERT_3_C Large K value in the Analysis of Variance ..... |                                        | 7.702 Check |
| PLAT911_ALERT_3_C Missing # FCF Refl Between THmin & STh/L= 0.595 |                                        | 15 Report   |

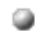

#### Alert level G

PLAT910\_ALERT\_3\_G Missing # of FCF Reflection(s) Below Th(Min) ...              1 Report

- 0 **ALERT level A** = Most likely a serious problem - resolve or explain
- 1 **ALERT level B** = A potentially serious problem, consider carefully
- 6 **ALERT level C** = Check. Ensure it is not caused by an omission or oversight
- 1 **ALERT level G** = General information/check it is not something unexpected

1 ALERT type 1 CIF construction/syntax error, inconsistent or missing data  
2 ALERT type 2 Indicator that the structure model may be wrong or deficient  
4 ALERT type 3 Indicator that the structure quality may be low  
1 ALERT type 4 Improvement, methodology, query or suggestion  
0 ALERT type 5 Informative message, check

---

It is advisable to attempt to resolve as many as possible of the alerts in all categories. Often the minor alerts point to easily fixed oversights, errors and omissions in your CIF or refinement strategy, so attention to these fine details can be worthwhile. In order to resolve some of the more serious problems it may be necessary to carry out additional measurements or structure refinements. However, the purpose of your study may justify the reported deviations and the more serious of these should normally be commented upon in the discussion or experimental section of a paper or in the "special\_details" fields of the CIF. checkCIF was carefully designed to identify outliers and unusual parameters, but every test has its limitations and alerts that are not important in a particular case may appear. Conversely, the absence of alerts does not guarantee there are no aspects of the results needing attention. It is up to the individual to critically assess their own results and, if necessary, seek expert advice.

### **Publication of your CIF in IUCr journals**

A basic structural check has been run on your CIF. These basic checks will be run on all CIFs submitted for publication in IUCr journals (*Acta Crystallographica*, *Journal of Applied Crystallography*, *Journal of Synchrotron Radiation*); however, if you intend to submit to *Acta Crystallographica Section C* or *E*, you should make sure that full publication checks are run on the final version of your CIF prior to submission.

### **Publication of your CIF in other journals**

Please refer to the *Notes for Authors* of the relevant journal for any special instructions relating to CIF submission.

---

**PLATON version of 29/01/2015; check.def file version of 29/01/2015**

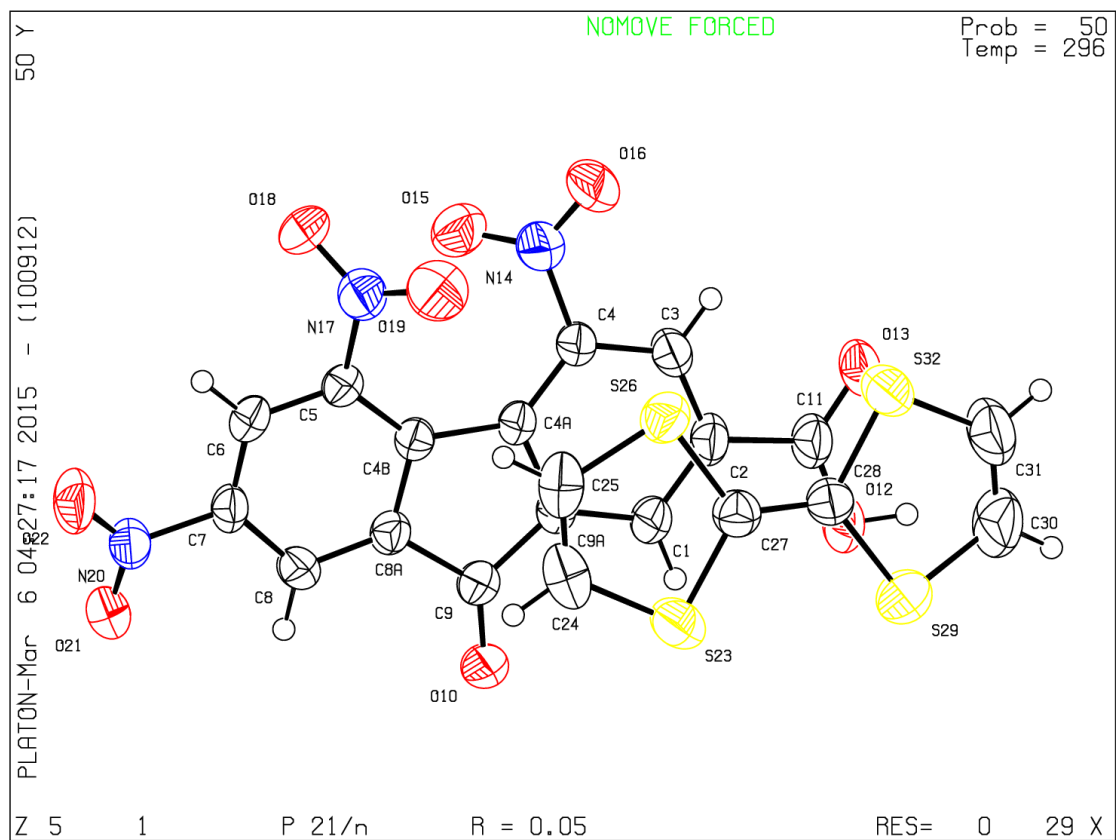

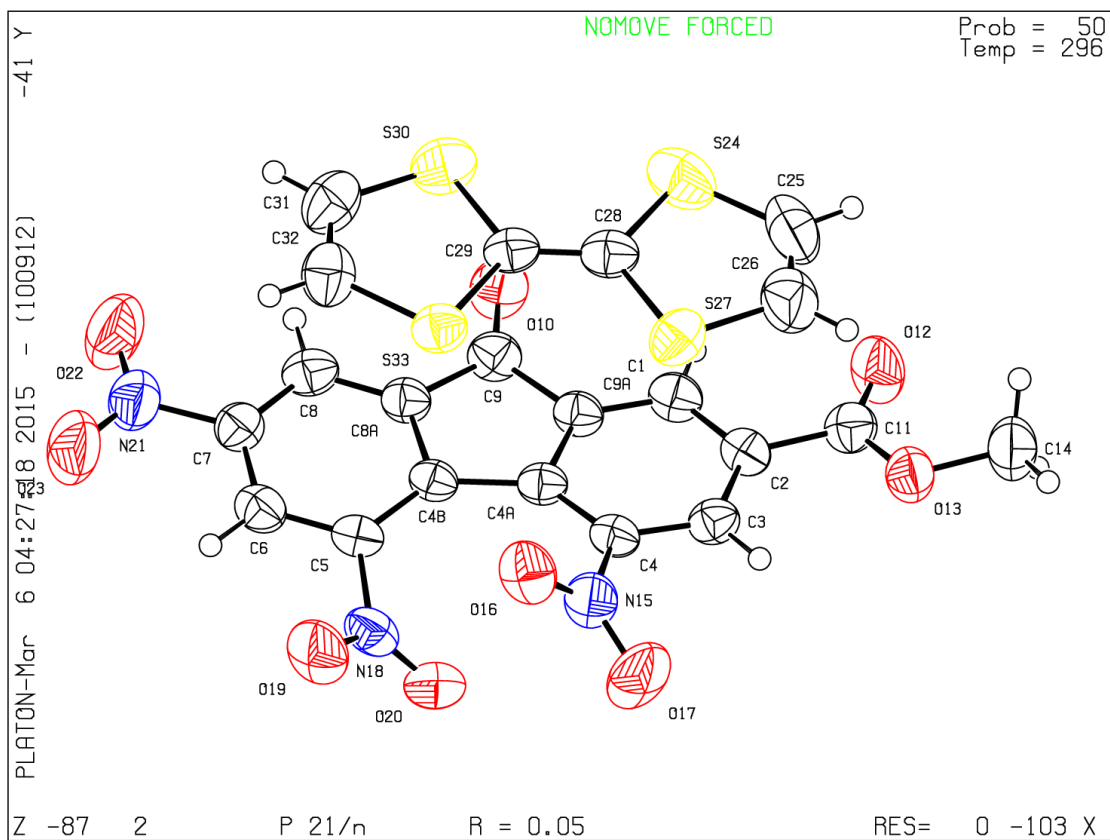

Supplement: s1 [file s1]
